# Supplementary material for: Fully understanding the positive roles of plasmonic nanoparticles in ameliorating the efficiency of organic solar cells
Source: Royal Society of Chemistry journal article supplement (doi:10.1039/c5nr04069h), 2015-01-01
Supplement: c5nr04069h1.pdf [file c5nr04069h1.pdf]

## Fully understanding the positive roles of plasmonic nanoparticles in ameliorating the efficiency of organic solar cells

Dan Chi,<sup>†a</sup> Shudi Lu,<sup>†a</sup> Rui Xu,<sup>b</sup> Kong Liu,<sup>a</sup> Dawei Cao,<sup>b</sup> Liaoyong Wen,<sup>b</sup> Yan Mi<sup>b</sup>, Zhijie Wang,<sup>a,\*</sup> Yong Lei,<sup>b,\*</sup> Shengchun Qu<sup>a,\*</sup> and Zhanguo Wang<sup>a</sup>

---

<sup>a</sup> Key Laboratory of Semiconductor Materials Science, Institute of Semiconductors, Chinese Academy of Sciences, Beijing, 100083, People's Republic of China

E-mail: [wangzj@semi.ac.cn](mailto:wangzj@semi.ac.cn), [qsc@semi.ac.cn](mailto:qsc@semi.ac.cn)

<sup>b</sup> Institut für Physik & IMN MacroNano@ (ZIK), Technische Universität Ilmenau, 98693 Ilmenau, Germany

E-mail: [yong.lei@tu-ilmenau.de](mailto:yong.lei@tu-ilmenau.de)

<sup>†</sup> These authors contributed equally to this work.

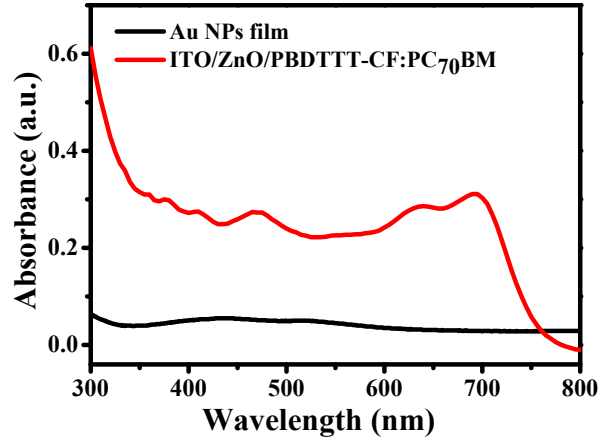

Fig. S1. Absorbance spectra of the Au NP film spin-coated at 2000 rpm and the ITO/ZnO/PBDTTT-CF:PC<sub>70</sub>BM.

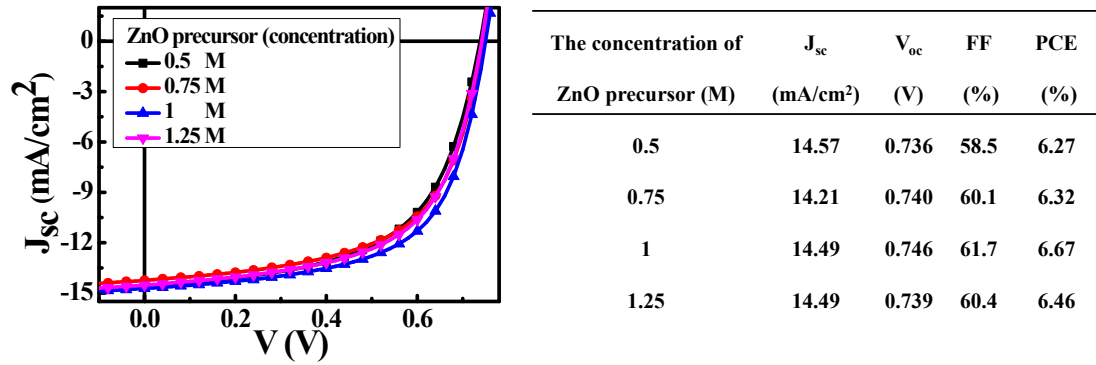

Fig. S2. The optimization of the device performance by the thicknesses of ZnO layer. The ZnO film prepared from the 1 M precursor solution has a thickness of 35 nm and the relevant device presents the best performance. The devices with ZnO film prepared from a lower concentrated precursor solution show a lower performance, probably due to the imperfect coverage of the ZnO thin film on the substrate. In addition, the performance decrease of the device with a thicker layer of ZnO could be attributed to the inefficient charge transport, due to the imperfect crystal quality of the ZnO film.

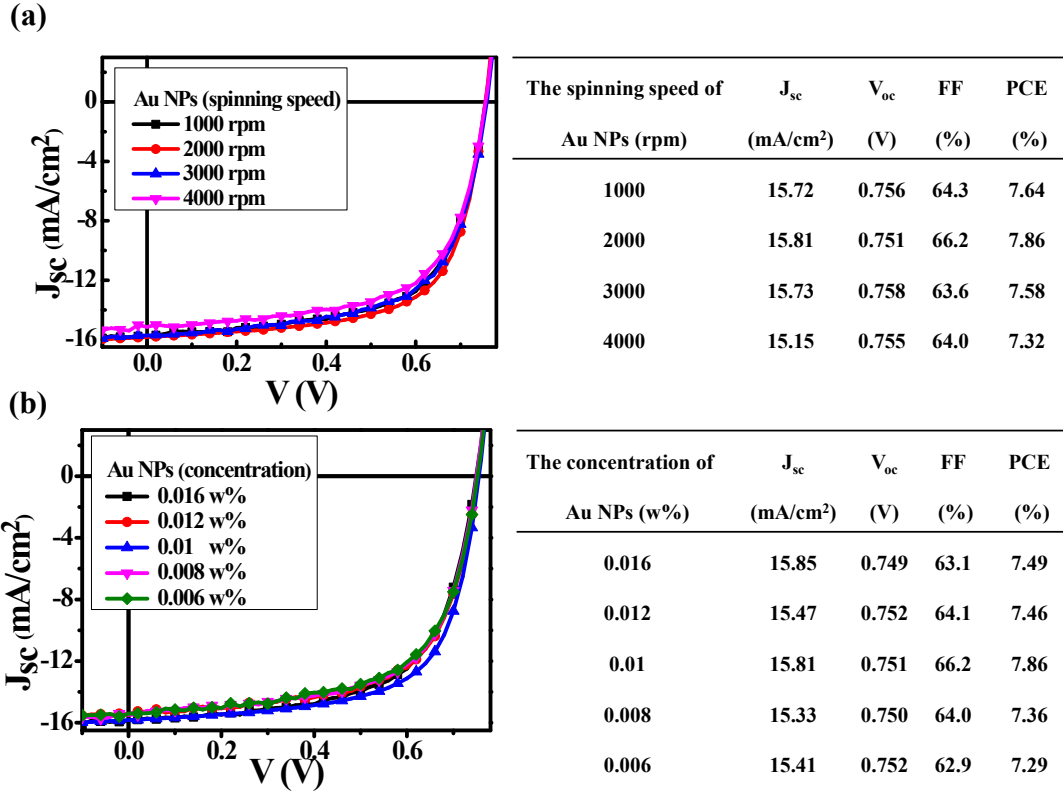

Fig. S3. The optimization of device performance by Au NP (41 nm) density distributions. (a) The influence of spin-coating rate on the device performance. (b) The impact of Au NP concentration in the spin-coating solution on the device performance. These results indicate that the Au NP film prepared from a 0.01 w% solution at the spin-coating rate of 2000 rpm yields the best device performance. The dense distribution of Au particles would deteriorate the performance by blocking the light, and the sparse distribution of Au would not have obvious effects of scattering and SPR.

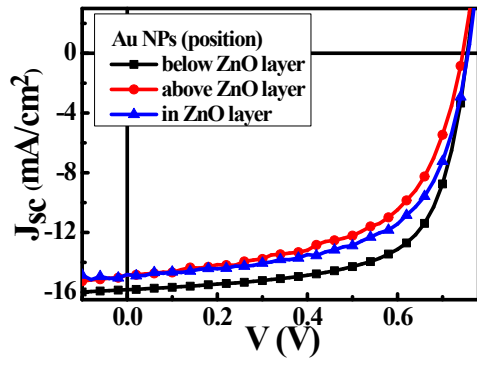

| The position of<br>Au NPs | $J_{sc}$<br>(mA/cm <sup>2</sup> ) | $V_{oc}$<br>(V) | FF<br>(%) | PCE<br>(%) |
|---------------------------|-----------------------------------|-----------------|-----------|------------|
| below ZnO layer           | 15.81                             | 0.751           | 66.2      | 7.86       |
| above ZnO layer           | 14.83                             | 0.745           | 57.8      | 6.38       |
| in ZnO layer              | 14.82                             | 0.756           | 61.2      | 6.86       |

Fig. S4. Impact of Au NPs position on the device performance. The device with Au NPs at the interface of ITO/ZnO presents the best performance. The direct contact of Au NPs with ITO glass is helpful for collecting the charges in the device. When the Au NPs are inserted in the ZnO layer, the efficiency becomes lower. In this case, the charge collecting efficiency of the structure could not be improved. For the device with Au NPs on the top of ZnO layer, the direct exposure of the metallic nanoparticles to the polymer layer could cause the recombination of the photo-generated charge carriers, which deteriorates the device efficiency.

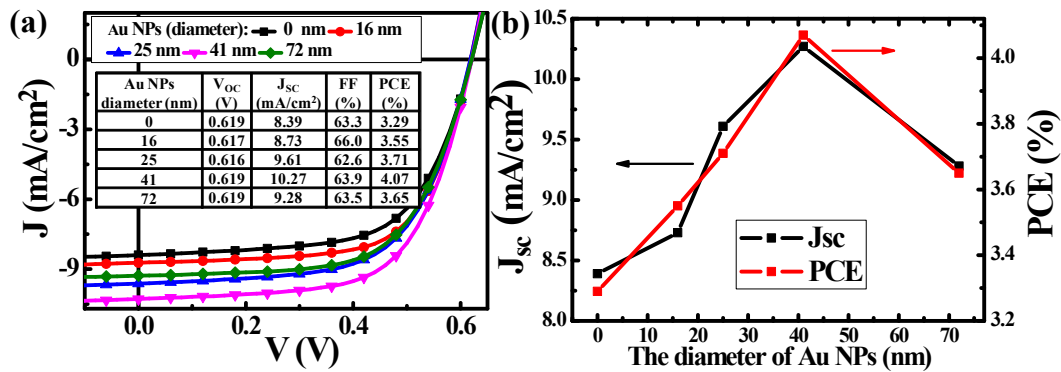

Fig. S5. (a) J-V curves of the devices (P3HT:PC<sub>60</sub>BM) with different diameters of Au NPs. (b)  $J_{sc}$  and PCE vs the diameter of Au NPs. To be exciting, these results show the same trend in OSC performance vs Au NP sizes with that in the OSC based on PBDTTT-CF:PC<sub>70</sub>BM, indicative of the feasibility of using plasmonic particles to enhance the energy conversion efficiency of the solar cells.

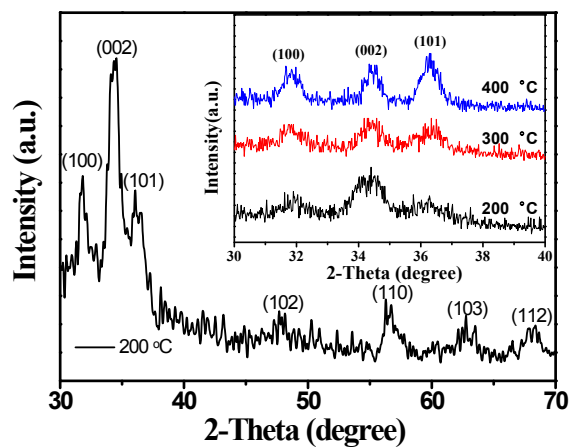

Fig. S6. X-ray diffraction pattern of the ZnO film annealed at different temperatures. The ZnO film annealed at 200 °C shows a series of diffraction peaks, which are corresponding to the wurtzite structure of ZnO (Zincite, JCPDS 5-0664). When the annealing temperatures are increased from 200 °C to 400 °C, the crystalline quality of the ZnO films can only be improved slightly, which should not render an obvious difference in the photovoltaic performance for the devices with 35 nm ZnO layer.

Table S1. The parameters of bi-exponential model for fitting the photoluminescence decay curves.

| <b>The diameter of<br/>Au NPs (nm)</b> | <b>B<sub>1</sub></b> | <b>T<sub>1</sub><br/>(ns)</b> | <b>B<sub>2</sub></b> | <b>T<sub>2</sub><br/>(ns)</b> | <b>&lt;τ&gt;<br/>(ns)</b> |
|----------------------------------------|----------------------|-------------------------------|----------------------|-------------------------------|---------------------------|
| <b>0</b>                               | 0.001479             | 4.731                         | 0.323                | 0.1417                        | 0.75027±0.0928            |
| <b>16</b>                              | 0.4004               | 0.135                         | 0.0033               | 3.039                         | 0.58947±0.132             |
| <b>25</b>                              | 0.6818               | 0.083                         | 0.0073               | 1.528                         | 0.32093±0.0254            |
| <b>41</b>                              | 0.7263               | 0.081                         | 0.0046               | 1.740                         | 0.27968±0.118             |
| <b>72</b>                              | 0.001684             | 3.266                         | 0.3649               | 0.1241                        | 0.46437±0.0207            |

The fitting was performed with the bi-exponential model:

$$A + B_1 * \exp\left(-\frac{t}{T_1}\right) + B_2 * \exp\left(-\frac{t}{T_2}\right) \quad (\text{S1})$$

The lifetime was calculated by:

$$\langle \tau \rangle = \frac{B_1 \times T_1^2 + B_2 \times T_2^2}{B_1 \times T_1 + B_2 \times T_2} \quad (\text{S2})$$
